# Supplementary material for: Hop Compounds: Extraction Techniques, Chemical Analyses, Antioxidative, Antimicrobial, and Anticarcinogenic Effects
Source: PubMed Central journal article supplement (PMC6412513; doi:10.3390/nu11020257), 2019-01-24
Supplement: nutrients-11-00257-s001.pdf [file nutrients-11-00257-s001.pdf]

## Supplementary material

### Hop compounds: extraction techniques, chemical analyses, antioxidative, antimicrobial and anticarcinogenic effects

Maša Knez Hrnčič<sup>1,#</sup>, Eva Španinger<sup>2,#</sup>, Iztok Jože Košir<sup>3</sup>, Željko Knez<sup>1</sup> and Urban Bren<sup>2,\*</sup>

- <sup>1</sup> Laboratory of Separation Processes and Product Design, Faculty of Chemistry and Chemical Engineering, University of Maribor, Smetanova ulica 17, SI-2000 Maribor, Slovenia.
  - <sup>2</sup> Laboratory of Physical Chemistry and Chemical Thermodynamics, Faculty of Chemistry and Chemical Engineering, University of Maribor, Smetanova ulica 17, SI-2000 Maribor, Slovenia.
  - <sup>3</sup> Slovenian Institute of Hop Research and Brewing, Cesta Žalskega Tabora 2, SI-3310 Žalec, Slovenia.
- # These authors contributed equally to this work.  
\* Correspondence: urban.bren@um.si; Tel.: +386-2-2294-421

Figure S1. Chemical structures of typical representatives of soft and hard resins.

| Class                       | Structure | Representatives |
|-----------------------------|-----------|-----------------|
| Soft resins/ Bitter acids   |           | Adhumulone      |
| Alpha-acids and derivatives |           | Adprehumolone   |
|                             |           | Cohumulone      |

---

**Soft resins/ Bitter acids**

Alpha-acids and derivatives

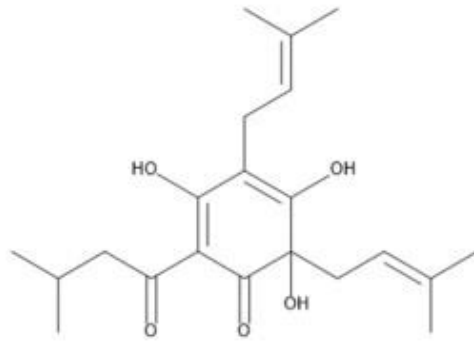

Humulone

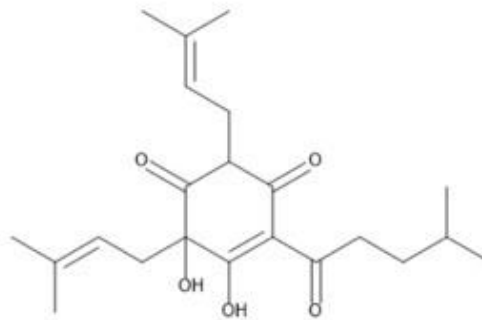

Prehumulone

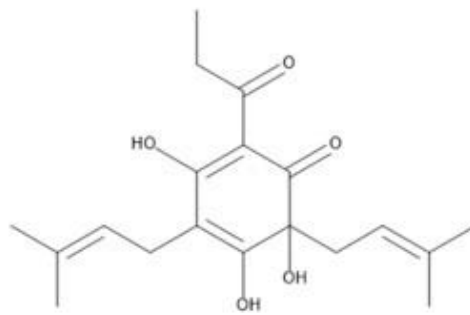

Posthumulone

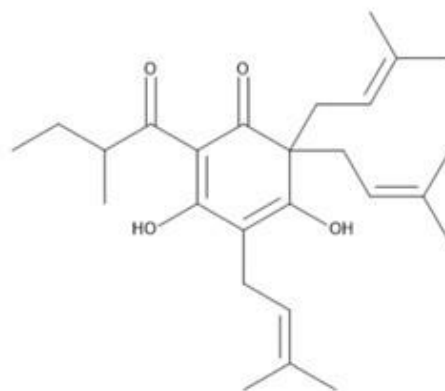

Adlupulone

---

---

**Soft resins/ Bitter acids**

Beta-acids and derivatives

Colupulone

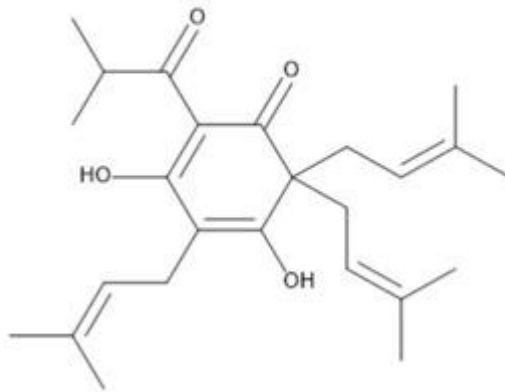

Lupulone

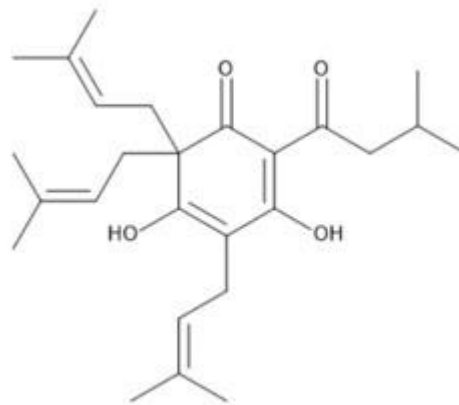

Prelupulone

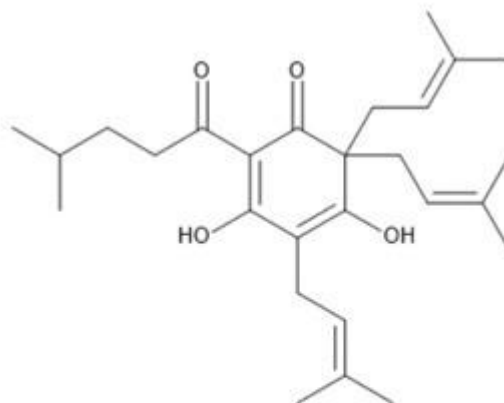

---

**Hard Resins/  
Polyphenols**

Catechins

(-)-Catechin

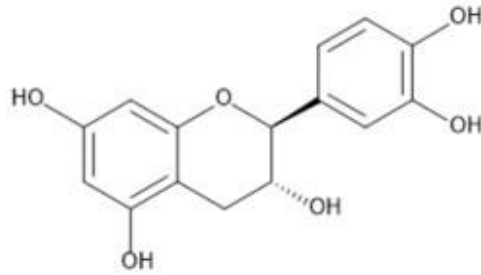

Epicatechin

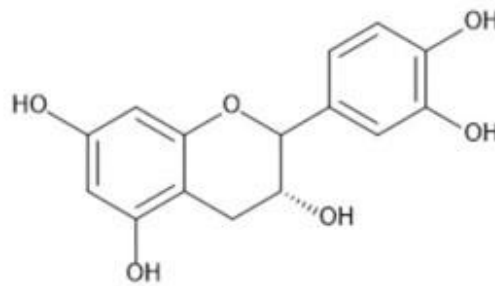

Epigallocatechin

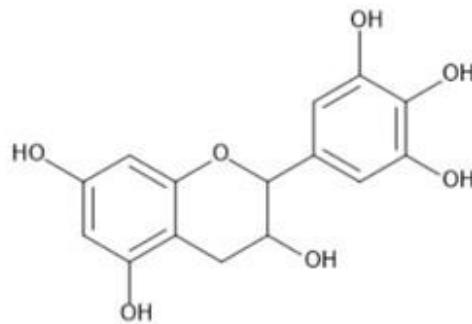

Epigallocatechin-3-  
O-gallate

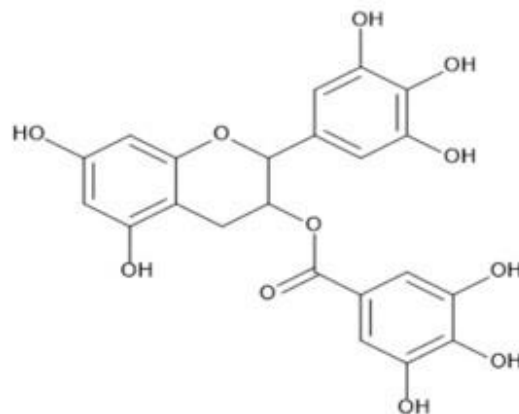

---

Hard Resins/  
Polyphenols

Kaempferol

Flavonols

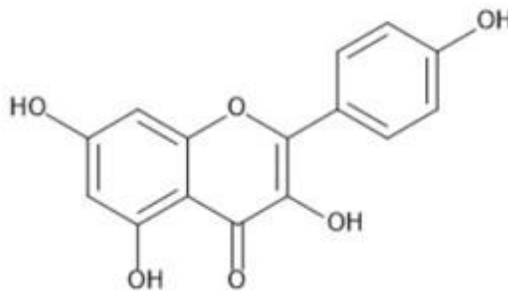

Quercetin

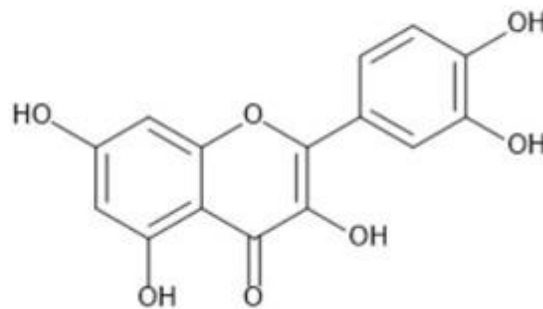

Multifidol  
glucosides

Multifidol glucoside

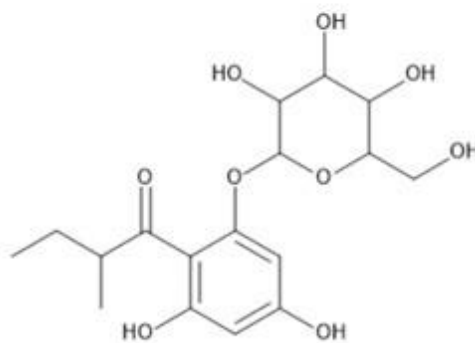

Hydroxybenzoic  
acids and  
derivatives

Ellagic acid

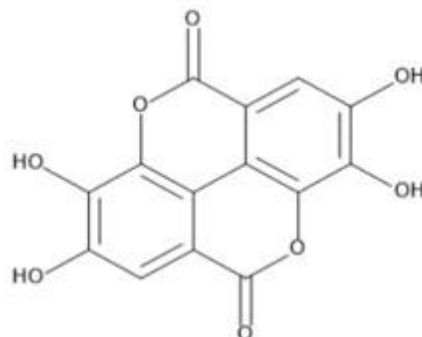

---

**Hard Resins/  
Polyphenols**

Gallic acid

Hydroxybenzoic  
acids and  
derivatives

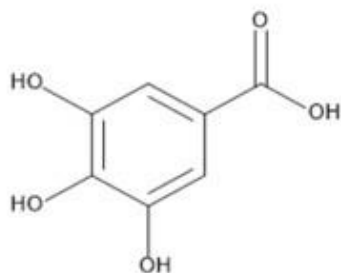

Hydroxycinnamic  
acids and  
derivatives

Caffeic acids

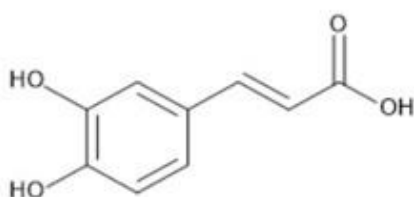

Chlorogenic acids

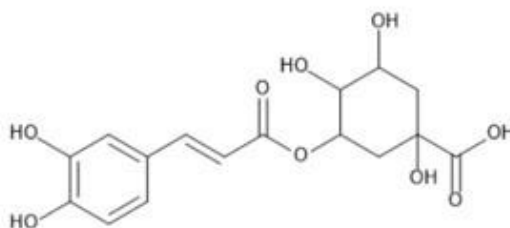

Ferulic acid

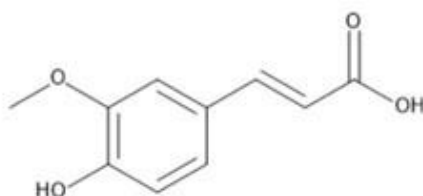

Rosmarinic acid

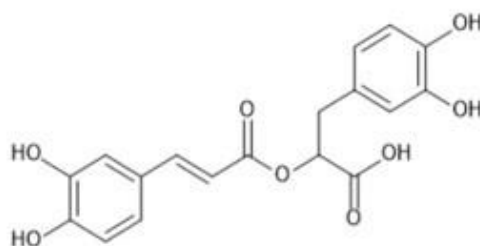

Prenylflavonoids

Xanthohumol

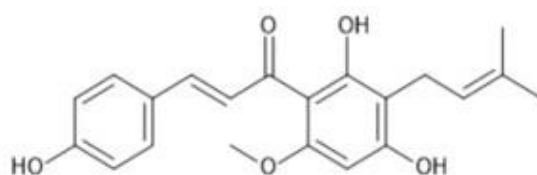

---

**Hard Resins/  
Polyphenols**

Prenylflavonoids

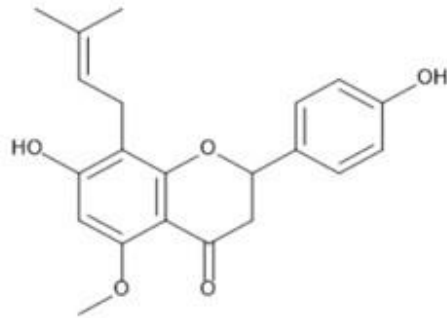

Isoxanthohumol

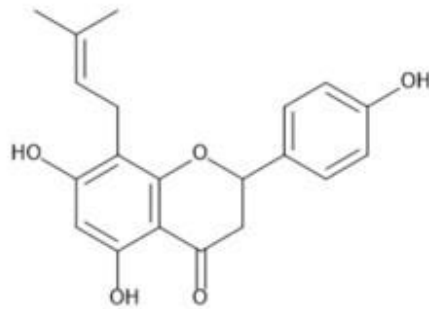

8-prenylnaringenin

Stilbenes

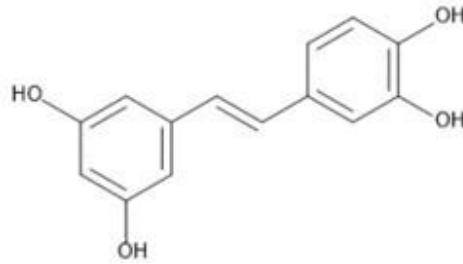

Piceatannol

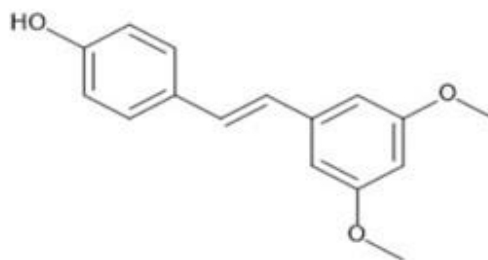

Pterostilbene

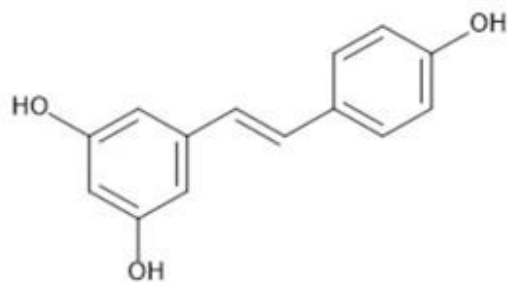

Resveratrol

---
